# Supplementary material
Source: MDPI journal article supplement (https://www.mdpi.com/1999-4893/12/8/156)
Supplement: s1 [file s1]

# Numerical Solution of a Nonlinear Dynamical System

## by a Collocation Method based on Linear B-spline Basis

Author : Francesca Pitolli

References :

- 1) F. Pitolli, Fractals&Fractionals, 2018
- 2) F. Pitolli, Axioms, 2018
- 3) E. Pellegrino, L. Pezza, F. Pitolli, submitted, 2019
- 4) F. Pitolli, Algorithms, 2019

Version: July, 2019

---

## Define the Nonlinear Dynamical System

Test Problems :

- 1) Linear dynamical system
- 2) Nonlinear dynamical system

(\* Known term of the dynamical system \*)

Clear[y, z, w, F, JF]

Problem = 1;

Which[Problem == 1, F = {y + z + w, -y + z - w, -Gamma[ $\frac{3}{2}$ ] w};,

Problem == 2, F = {y + z + 100  $\sqrt{\pi}$  y<sup>2</sup> + w, -y + z + 100  $\sqrt{\pi}$  y<sup>2</sup> - w, w<sup>2</sup> -  $\frac{1}{200}$   $\sqrt{\pi}$  w};

]

Y = {y, z, w};

nF = Dimensions[F][[1]];

(\* Initial conditions \*)

Clear[Y0]

Y0 = {0.05, 0.05, 0.05};

(\* Jacobian matrix of F \*)

Clear[JF]

JF = Outer[D, F, Y];

MatrixForm[JF]

(\* Order of the time fractional derivative (0 < b < 1) \*)

b = 0.5;

## Basis Functions

### Left-edge boundary function

```

In[ ]:= (* Left edge function *)
Clear[N01]

N01[x_] := Piecewise[{{(1 - x), 0 ≤ x ≤ 1}}]

```

### Linear B - Spline

```

In[ ]:=
Clear[B1]
B1[x_] := Piecewise[{{x, 0 ≤ x ≤ 1}, {2 - x, 1 ≤ x ≤ 2}}]

```

## Caputo derivative of fractional order $b$ ( $0 < b < 1$ )

### Caputo Derivative of the interior functions

```

In[ ]:= (* Derivative of the left edge function *)
Clear[derN01]

derN01[x_, b_] :=  $\frac{1}{\Gamma[2 - b]}$  Piecewise[{{-x1-b, 0 ≤ x ≤ 1}, {-x1-b + (x - 1)1-b, 1 ≤ x}}]

```

## Caputo Derivative of the linear B – spline

```
In[ ]:= Clear[derB1]
```

$$\text{derB1}[x\_ , b\_ ] := \frac{1}{\text{Gamma}[2 - b]} \text{Piecewise}\left[\left\{\left\{x^{1-b}, 0 \leq x \leq 1\right\}, \left\{x^{1-b} - 2(x-1)^{1-b}, 1 \leq x \leq 2\right\}, \left\{x^{1-b} - 2(x-1)^{1-b} + (x-2)^{1-b}, 2 \leq x\right\}\right\}\right]$$

---

## Inputs for the collocation method

```
In[ ]:= (* Discretization interval: [0,T] *)
```

```
T = 8;
```

```
(* Refinement step *)
```

```
js = 4;
```

```
h =  $\frac{1}{2^{js}}$ 
```

```
(* Number of interior basis functions *)
```

```
Nkint = T / h;
```

```
(* Number of left edge basis functions *)
```

```
Nkedge = 1;
```

```
(* Number of basis functions *)
```

```
Nk = Nkint + Nkedge
```

## Collocation Points

```

In[ ]:= Clear[TPoints]

dt =  $\frac{h}{2}$ ;
Ns = T / dt
TPoints = Table[i dt, {i, 1, Ns}]

If[Ns < Nk, Print["ERROR: Ns should be greater than or equal to Nk"]]

```

## Collocation Matrix for the Cubic B-spline Basis

```

In[ ]:= (* Interior functions *)
Clear[Mcoll0int]
Mcoll0int = Table[N[B1[ $\frac{\text{TPoints}[[i]]}{h} - k$ ]], {i, 2, Ns}, {k, 0, Nkint - 1}];

(* Collocation matrix *)
Mcoll0 = Transpose[Mcoll0int];
Dimensions[Mcoll0]
Clear[Mcoll0int]

```

## Collocation Matrix for the Caputo Derivative of the B-spline Basis

```

In[ ]:= (* Normalization factor for the derivative*)
normder = 2^(js b);

(* Interior functions *)
Clear[Mcoll1int]
Mcoll1int = Table[N[normder derB1[ $\frac{\text{TPoints}[[i]]}{h} - k, b]$ ], {i, 2, Ns}, {k, 0, Nkint - 1}];

(* Collocation matrix *)
Mcoll1 = Transpose[Mcoll1int];
Dimensions[Mcoll1]
Clear[Mcoll1int]

```

## Solution of the Nonlinear System

### Iteration loop

```

In[ ]:= (* Assign the initial guess and the parameters*)
Clear[lambd0]
lambd0 = Table[0., {i, 1, nF}, {j, 1, Nk - 1}];
tau = 0.1;
Normlam = 10 tau;
maxiter = 10;
ell = 0;

While[Normlam > tau && ell < maxiter,

  (* Evaluate the approximate solution at the previous iteration step *)
  Clear[Ys];
  Ys = Table[Transpose[Mcoll0].lambd0[[n]], {n, 1, nF}] + Y0;

```

```

Print[ListPlot[Table[{TPoints[[i]], Ys[[k, i - 1]]}, {k, 1, nF}, {i, 2, Ns}],
  Joined → True, PlotRange → All, PlotLabel → "Solution"]];

(* Evaluate the Jacobian matrix at the previous iteration step *)
JFNodes = Table[JF /. {y -> Ys[[1, i]], z -> Ys[[2, i]], w -> Ys[[3, i]]}, {i, 1, Ns - 1}];

(* Construct the second term of the Jacobian matrix
  J_G by multiplying the Jacobian matrix J_F with the collocation B-spline matrix *)
JFblock = Table[Outer[Times, JFNodes[[i]], Mcoll0[[i]]], {i, 1, Nk - 1}];
JJ = ArrayFlatten[Transpose[JFblock, {4, 1, 2, 3}], 2];

(* Construct the Jacobian matrix J_G *)
Clear[Mcoll];
Mcoll = KroneckerProduct[IdentityMatrix[nF], Transpose[Mcoll1]] - JJ;

(* Construct the known term *)
Clear[BG];
BG = KroneckerProduct[IdentityMatrix[nF], Transpose[Mcoll1]] . Flatten[lambda0] -
  Flatten[Transpose[Table[F /. {y -> Ys[[1, i]], z -> Ys[[2, i]], w -> Ys[[3, i]]}, {i, 1, Ns - 1}]]];

(* Solve the linear system by the least squares method *)
Clear[GamK];
GamK = LeastSquares[Mcoll, N[BG]];

(* Update the unknown coefficients *)
Clear[lambda];
lambda = lambda0 - Partition[GamK, Nk - 1];

(* Evaluate the infinity norm of the relative error *)
Normlam = Norm[lambda - lambda0, Infinity] / Norm[lambda, Infinity];

(* Update the iteration counter and the previous solution *)
ell ++;
lambda0 = lambda;

```

```
(* Print the relative error at iteration ell *)
Print["Iteration = ", ell, "    Norm = ", Normlam];
]
```

## Evaluate the Numerical Solution

```
In[ ]:= Clear[B1sint, B1s]
```

```
(* Points where to evaluate the numerical solution *)
```

```
h2 =  $\frac{h}{4}$ ;
```

```
Nr =  $\frac{T}{h2} + 1$ ;
```

```
Tval = Table[i h2, {i, 0, Nr - 1}];
```

```
(* Function basis on the evaluation points *)
```

```
B1sint = Table[N[B1[ $\frac{Tval[[i]]}{h} - k$ ]], {i, 1, Nr}, {k, 0, Nkint - 1}];
```

```
B1s = Transpose[B1sint];
```

```
(* Print the numerical solution *)
```

```
Clear[Yh]
```

```
Yh = Table[Transpose[B1s].lambda[[n]], {n, 1, nF}] + Y0;
```

```
ListPlot[Table[{Tval[[i]], Yh[[k, i]]}, {k, 1, nF}, {i, 1, Nr}], Joined → True, PlotRange → All]
```
