# Supplementary material
Source: MDPI journal article supplement (https://www.mdpi.com/1999-4893/12/8/156)
Supplement: s1 [file s1]

# Numerical Solution of a Nonlinear Dynamical System

## by a Collocation Method based on Cubic B-spline Basis

Author : Francesca Pitolli

References :

- 1) F. Pitolli, Fractals&Fractionals, 2018
- 2) F. Pitolli, Axioms, 2018
- 3) E. Pellegrino, L. Pezza, F. Pitolli, submitted, 2019
- 4) F. Pitolli, Algorithms, 2019

Version: July, 2019

---

### Define the Nonlinear Dynamical System

Test Problems :

- 1) Linear dynamical system
- 2) Nonlinear dynamical system

In[6] :=

(\* Known term of the dynamical system \*)

Clear[y, z, w, F, JF]

Problem = 1;

Which[Problem == 1, F = {y + z + w, -y + z - w, -Gamma[ $\frac{3}{2}$ ] w};,Problem == 2, F = {y + z + 100  $\sqrt{\pi}$  y^2 + w, -y + z + 100  $\sqrt{\pi}$  y^2 - w, w^2 -  $\frac{1}{200}$   $\sqrt{\pi}$  w};

]

Y = {y, z, w};

nF = Dimensions[F][[1]];

(\* Initial conditions \*)

Clear[Y0]

Y0 = {0.05, 0.05, 0.05};

(\* Jacobian matrix of F \*)

Clear[JF]

JF = Outer[D, F, Y];

MatrixForm[JF]

(\* Order of the time fractional derivative (0 &lt; b &lt; 1) \*)

b = 0.5;

# Basis Functions

## Left-edge boundary functions

*In[ ]:=* (\* First left edge function \*)

Clear[N03]

N03[x\_] := Piecewise[{{(1 - x)^3, 0 ≤ x ≤ 1}}]

(\* Second left edge function \*)

Clear[N13]

N13[x\_] := Piecewise[{{ $\frac{1}{4}(2 - x)^3 - 2(1 - x)^3$ , 0 ≤ x ≤ 1}, { $\frac{1}{4}(2 - x)^3$ , 1 ≤ x ≤ 2}}]

(\* Third left edge function \*)

Clear[N23]

N23[x\_] :=

Piecewise[{{ $\frac{1}{6}(3 - x)^3 - \frac{3}{4}(2 - x)^3 + \frac{3}{2}(1 - x)^3$ , 0 ≤ x ≤ 1}, { $\frac{1}{6}(3 - x)^3 - \frac{3}{4}(2 - x)^3$ , 1 ≤ x ≤ 2}, { $\frac{1}{6}(3 - x)^3$ , 2 ≤ x ≤ 3}}]

## Cubic B - Spline

*In[ ]:=*

Clear[B3]

B3[x\_] := Piecewise[{{ $\frac{1}{6}x^3$ , 0 ≤ x ≤ 1}, { $\frac{1}{6}(x^3 - 4(x - 1)^3)$ , 1 ≤ x ≤ 2},  
{ $\frac{1}{6}(x^3 - 4(x - 1)^3 + 6(x - 2)^3)$ , 2 ≤ x ≤ 3}, { $\frac{1}{6}(x^3 - 4(x - 1)^3 + 6(x - 2)^3 - 4(x - 3)^3)$ , 3 ≤ x ≤ 4}}]

*In[ ]:=* Plot[{N03[x], N13[x], N23[x], B3[x]}, {x, 0, 4}, PlotRange → All]

---

## Caputo derivative of fractional order $b$ ( $0 < b < 1$ )

---

Caputo Derivative of the interior functions

In[ ]:= **(\* Derivative of the first left edge function \*)**

Clear[derN03]

$$\text{derN03}[x\_ , b\_ ] := \frac{-3}{\text{Gamma}[1 - b] (-3 + b) (-2 + b) (-1 + b)} \text{Piecewise}\left[\left\{\left\{-x^{1-b} (6 - 5b + b^2 - 6x + 2bx + 2x^2), 0 \leq x \leq 1\right\}, \left\{2(-1+x)^{3-b} - 6x^{1-b} + 5bx^{1-b} - b^2x^{1-b} + 6x^{2-b} - 2bx^{2-b} - 2x^{3-b}, 1 \leq x\right\}\right\}\right]$$

**(\* Derivative of the second left edge function \*)**

Clear[derN13]

$$\text{derN13}[x\_ , b\_ ] := \frac{-3}{\text{Gamma}[1 - b] (-3 + b) (-2 + b) (-1 + b)} \text{Piecewise}\left[\left\{\left\{6x^{1-b} - 5bx^{1-b} + b^2x^{1-b} - 9x^{2-b} + 3bx^{2-b} + \frac{7x^{3-b}}{2}, 0 \leq x \leq 1\right\}, \left\{-4(-1+x)^{3-b} + 6x^{1-b} - 5bx^{1-b} + b^2x^{1-b} - 9x^{2-b} + 3bx^{2-b} + \frac{7x^{3-b}}{2}, 1 \leq x \leq 2\right\}, \left\{\frac{1}{2}(-2+x)^{3-b} - 4(-1+x)^{3-b} + 6x^{1-b} - 5bx^{1-b} + b^2x^{1-b} - 9x^{2-b} + 3bx^{2-b} + \frac{7x^{3-b}}{2}, 2 \leq x\right\}\right\}\right]$$

**(\* Derivative of the third left edge function \*)**

Clear[derN23]

$$\text{derN23}[x\_ , b\_ ] := \frac{-3}{\text{Gamma}[1 - b] (-3 + b) (-2 + b) (-1 + b)} \text{Piecewise}\left[\left\{\left\{x^{1-b} \left(-\frac{11}{6}x^2 + (3-b)x\right), 0 \leq x \leq 1\right\}, \left\{x^{1-b} \left(-\frac{11}{6}x^2 + (3-b)x\right) + 3(x-1)^{(3-b)}, 1 \leq x \leq 2\right\}, \left\{x^{1-b} \left(-\frac{11}{6}x^2 + (3-b)x\right) + 3(x-1)^{(3-b)} - \frac{3}{2}(x-2)^{(3-b)}, 2 \leq x \leq 3\right\}, \left\{x^{1-b} \left(-\frac{11}{6}x^2 + (3-b)x\right) + 3(x-1)^{(3-b)} - \frac{3}{2}(x-2)^{(3-b)} + \frac{1}{3}(x-3)^{(3-b)}, 3 \leq x\right\}\right\}\right]$$

## Caputo Derivative of the cubic B – spline

```
In[ ]:= Clear[derB3]
```

$$\text{derB3}[x_, b_] := \frac{1}{\text{Gamma}[4 - b]}$$

```
Piecewise[{ {x^(3 - b), 0 ≤ x ≤ 1}, {x^(3 - b) - 4 (x - 1)^(3 - b), 1 ≤ x ≤ 2}, {x^(3 - b) - 4 (x - 1)^(3 - b) + 6 (x - 2)^(3 - b), 2 ≤ x ≤ 3},
  {x^(3 - b) - 4 (x - 1)^(3 - b) + 6 (x - 2)^(3 - b) - 4 (x - 3)^(3 - b), 3 ≤ x ≤ 4},
  {x^(3 - b) - 4 (x - 1)^(3 - b) + 6 (x - 2)^(3 - b) - 4 (x - 3)^(3 - b) + (x - 4)^(3 - b), 4 ≤ x} }]
```

```
In[ ]:= Plot[{derN03[x, b], derN13[x, b], derN23[x, b], derB3[x, b]}, {x, 0, 8}, PlotRange → All]
```

## Inputs for the collocation method

*In[ ]:=* (\* Discretization interval: [0,T] \*)

T = 8;

(\* Refinement step \*)

js = 4;

$h = \frac{1}{2^{js}}$

(\* Number of interior basis functions \*)

Nkint = T / h;

(\* Number of left edge basis functions \*)

Nkedge = 3;

(\* Number of basis functions \*)

Nk = Nkint + Nkedge

*Out[ ]:=*  $\frac{1}{16}$

*Out[ ]:=* 131

*In[ ]:=*

## Collocation Points

```
In[ ]:= Clear[TPoints]

dt =  $\frac{h}{2}$ ;
Ns = T / dt
TPoints = Table[i dt, {i, 1, Ns}]

If[Ns < Nk, Print["ERROR: Ns should be greater than or equal to Nk"]]
```

Out[ ]:= 256

## Collocation Matrix for the Cubic B-spline Basis

```
In[ ]:= (* Interior functions *)
Clear[Mcoll0int]

Mcoll0int = Table[N[B3[ $\frac{TPoints[[i]]}{h} - k$ ]], {i, 2, Ns}, {k, 0, Nkint - 1}];

(* Edge functions *)
Clear[Mcoll0edge]

Mcoll0edge = Transpose[Table[{N[N13[ $\frac{TPoints[[i]]}{h}$ ]], N[N23[ $\frac{TPoints[[i]]}{h}$ ]]}, {i, 2, Ns}]];

(* Collocation matrix *)
Mcoll0 = Join[Mcoll0edge, Transpose[Mcoll0int]];
Dimensions[Mcoll0]
Clear[Mcoll0int, Mcoll0edge]
```

## Collocation Matrix for the Caputo Derivative of the B-spline Basis



```

In[6]:= (* Normalization factor for the derivative*)
normder = 2^(js b);

(* Interior functions *)
Clear[Mcoll1int]
Mcoll1int = Table[N[normder derB3[ $\frac{\text{TPoints}[[i]]}{h} - k, b]$ ], {i, 2, Ns}, {k, 0, Nkint - 1}];

(* Second and third edge functions *)
Clear[Mcoll1edge]
Mcoll1edge = Transpose[Table[{N[normder derN13[ $\frac{\text{TPoints}[[i]]}{h}, b]$ ], N[normder derN23[ $\frac{\text{TPoints}[[i]]}{h}, b]$ ]], {i, 2, Ns}]];

(* Collocation matrix *)
Mcoll1 = Join[Mcoll1edge, Transpose[Mcoll1int]];
Dimensions[Mcoll1]
Clear[Mcoll1int, Mcoll1edge]

```

---

## Solution of the Nonlinear System

### Iteration loop

```

In[6]:= (* Assign the initial guess and the parameters*)
Clear[lambd0]
lambd0 = Table[0., {i, 1, nF}, {j, 1, Nk - 1}];
tau = 0.1;
Normlam = 10 tau;
maxiter = 10;
ell = 0;

While[Normlam > tau && ell < maxiter,

```

```

(* Evaluate the approximate solution at the previous iteration step *)
Clear[YS];
YS = Table[Transpose[Mcoll0].lambda0[[n]], {n, 1, nF}] + Y0;
Print[ListPlot[Table[{TPoints[[i]], Ys[[k, i - 1]]}, {k, 1, nF}, {i, 2, Ns}],
  Joined → True, PlotRange → All, PlotLabel → "Solution"]];

(* Evaluate the Jacobian matrix at the previous iteration step *)
JFNodes = Table[JF /. {y -> Ys[[1, i]], z -> Ys[[2, i]], w -> Ys[[3, i]]}, {i, 1, Ns - 1}];

(* Construct the second term of the Jacobian matrix
  J_G by multiplying the Jacobian matrix J_F with the collocation B-spline matrix *)
JFblock = Table[Outer[Times, JFNodes[[i]], Mcoll0[[i]]], {i, 1, Nk - 1}];
JJ = ArrayFlatten[Transpose[JFblock, {4, 1, 2, 3}], 2];

(* Construct the Jacobian matrix J_G *)
Clear[Mcoll];
Mcoll = KroneckerProduct[IdentityMatrix[nF], Transpose[Mcoll1]] - JJ;

(* Construct the known term *)
Clear[BG];
BG = KroneckerProduct[IdentityMatrix[nF], Transpose[Mcoll1]] . Flatten[lambda0] -
  Flatten[Transpose[Table[F /. {y -> Ys[[1, i]], z -> Ys[[2, i]], w -> Ys[[3, i]]}, {i, 1, Ns - 1}]]];

(* Solve the linear system by the least squares method *)
Clear[GamK];
GamK = LeastSquares[Mcoll, N[BG]];

(* Update the unknown coefficients *)
Clear[lambda];
lambda = lambda0 - Partition[GamK, Nk - 1];

(* Evaluate the infinity norm of the relative error *)
Normlam = Norm[lambda - lambda0, Infinity] / Norm[lambda, Infinity];

(* Update the iteration counter and the previous solution *)

```

```

ell ++;
lambda0 = lambda;

(* Print the relative error at iteration ell *)
Print["Iteration = ", ell, "   Norm = ", Normlam];
]

```

## Evaluate the Numerical Solution

```

In[ ]:= Clear[B3sint, B3sedge, B3s]

```

```

(* Points where to evaluate the numerical solution *)

```

```

h2 =  $\frac{h}{4}$ ;

```

```

Nr =  $\frac{T}{h2} + 1$ ;

```

```

Tval = Table[i h2, {i, 0, Nr - 1}];

```

```

(* Function basis on the evaluation points *)

```

```

B3sint = Table[N[B3[ $\frac{Tval[[i]]}{h} - k$ ]], {i, 1, Nr}, {k, 0, Nkint - 1}];

```

```

B3sedge = Transpose[Table[{N[N13[Tval[[i]] / h]], N[N23[ $\frac{Tval[[i]]}{h}$ ]]}, {i, 1, Nr}]];

```

```

B3s = Join[B3sedge, Transpose[B3sint]];

```

```

(* Print the numerical solution *)

```

```

Clear[Ys]

```

```

Ys = Table[Transpose[B3s].lambda[[n]], {n, 1, nF}] + Y0;

```

```

ListPlot[Table[{Tval[[i]], Ys[[k, i]]}, {k, 1, nF}, {i, 1, Nr}], Joined -> True, PlotRange -> All]

```
